# Supplementary material
Source: MDPI journal article supplement (https://www.mdpi.com/1996-1073/16/9/3696)
Supplement: s1 [file s1]

## Supplementary Information

### Fabrication of Planar Perovskite Solar Cells using Ternary Metal Oxide Nanocomposite as Hole Transporting Material

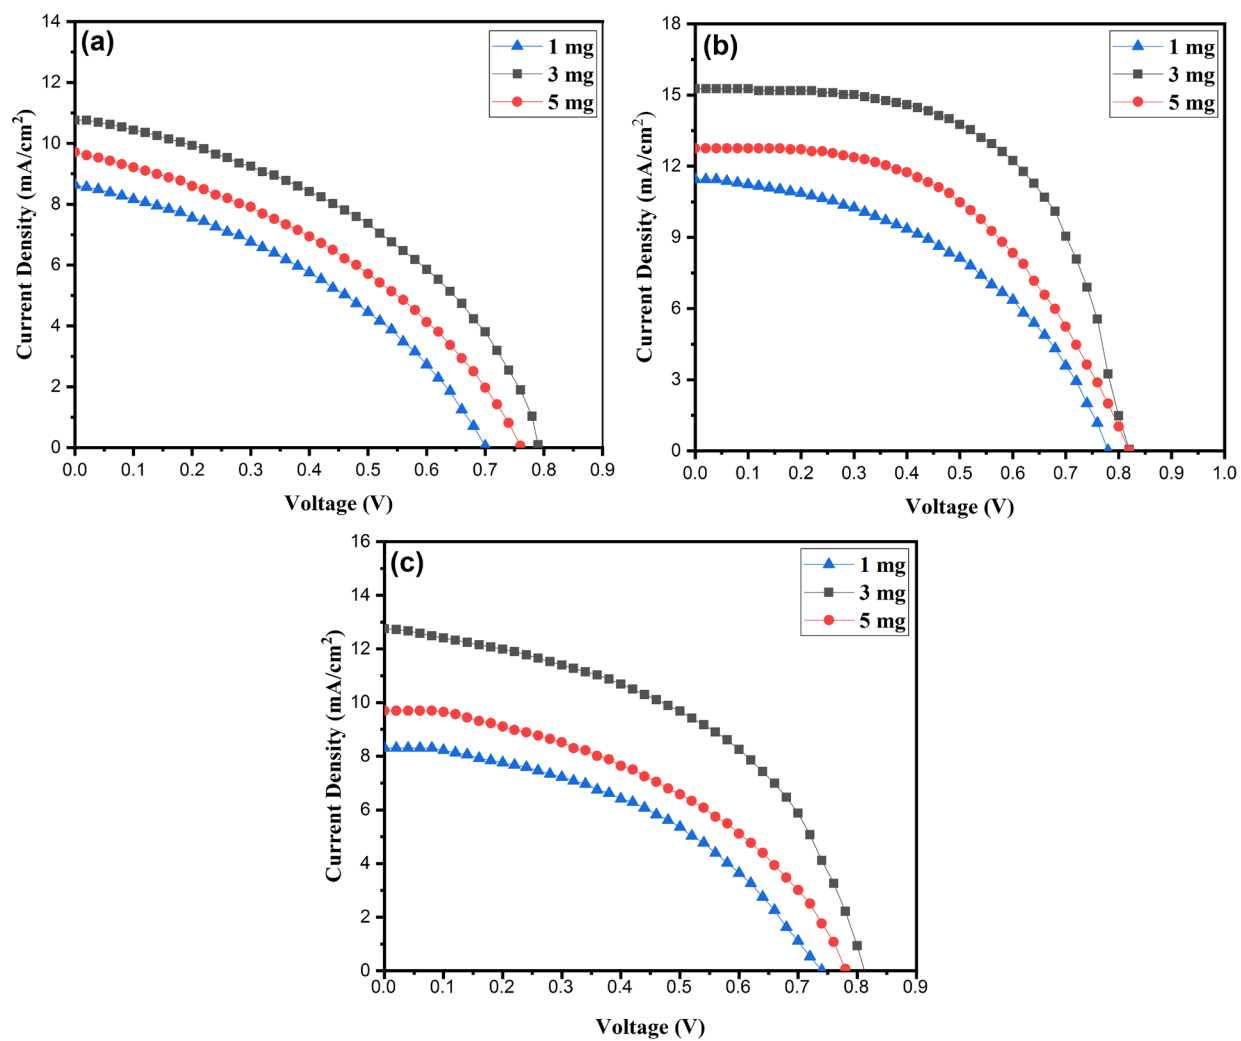

**Figure S1.** J-V curve of H1 based PSC device a) 1000 rpm b) 1500 rpm and c) 2000 rpm spin speed

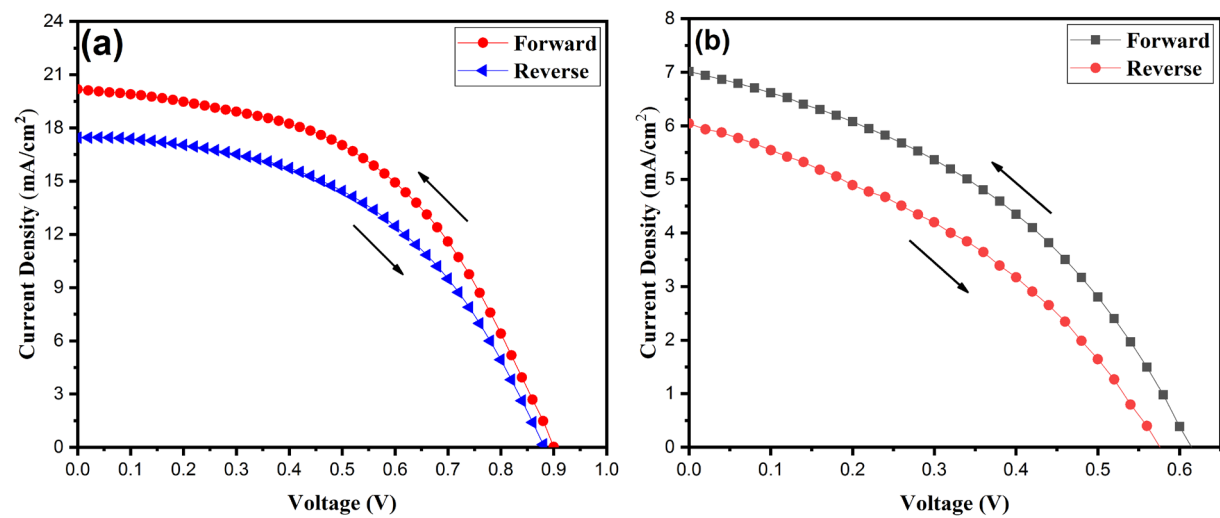

**Figure S2.** Forward and Reverse J-V curve for a) P3HT based device b) HTM-free device

**Table S1:** Photovoltaic parameters for H1 based PSC device

| <b>HTM</b> | <b>Spin speed<br/>(rpm)</b> | <b>Concentration<br/>(mg/mL)</b> | <b>V<sub>oc</sub><br/>(V)</b> | <b>J<sub>sc</sub><br/>(mA/cm<sup>2</sup>)</b> | <b>FF</b> | <b>PCE<br/>(%)</b> |
|------------|-----------------------------|----------------------------------|-------------------------------|-----------------------------------------------|-----------|--------------------|
| <b>H1</b>  | 1000                        | 1mg                              | 0.7                           | 8.6                                           | 0.37      | 2.22               |
|            |                             | 3mg                              | 0.76                          | 10.76                                         | 0.44      | 3.59               |
|            |                             | 5mg                              | 0.79                          | 9.70                                          | 0.37      | 2.83               |
|            | 1500                        | 1mg                              | 0.77                          | 11.33                                         | 0.46      | 4.01               |
|            |                             | 3mg                              | 0.82                          | 15.17                                         | 0.59      | 7.32               |
|            |                             | 5mg                              | 0.81                          | 12.16                                         | 0.48      | 4.96               |
|            | 2000                        | 1mg                              | 0.74                          | 8.2                                           | 0.44      | 2.66               |
|            |                             | 3mg                              | 0.80                          | 12.68                                         | 0.48      | 4.86               |
|            |                             | 5mg                              | 0.79                          | 9.71                                          | 0.45      | 3.45               |
